# Supplementary material for: Myeloid neoplasms with isolated isochromosome 17q demonstrate a high frequency of mutations in SETBP1, SRSF2, ASXL1 and NRAS
Source: PubMed Central journal article supplement (PMC4924712; doi:10.18632/oncotarget.7350), 2016-02-12
Supplement: oncotarget-07-14251-s001.pdf [file oncotarget-07-14251-s001.pdf]

## Myeloid neoplasms with isolated isochromosome 17q demonstrate a high frequency of mutations in *SETBP1*, *SRSF2*, *ASXL1* and *NRAS*

### Supplementary Materials

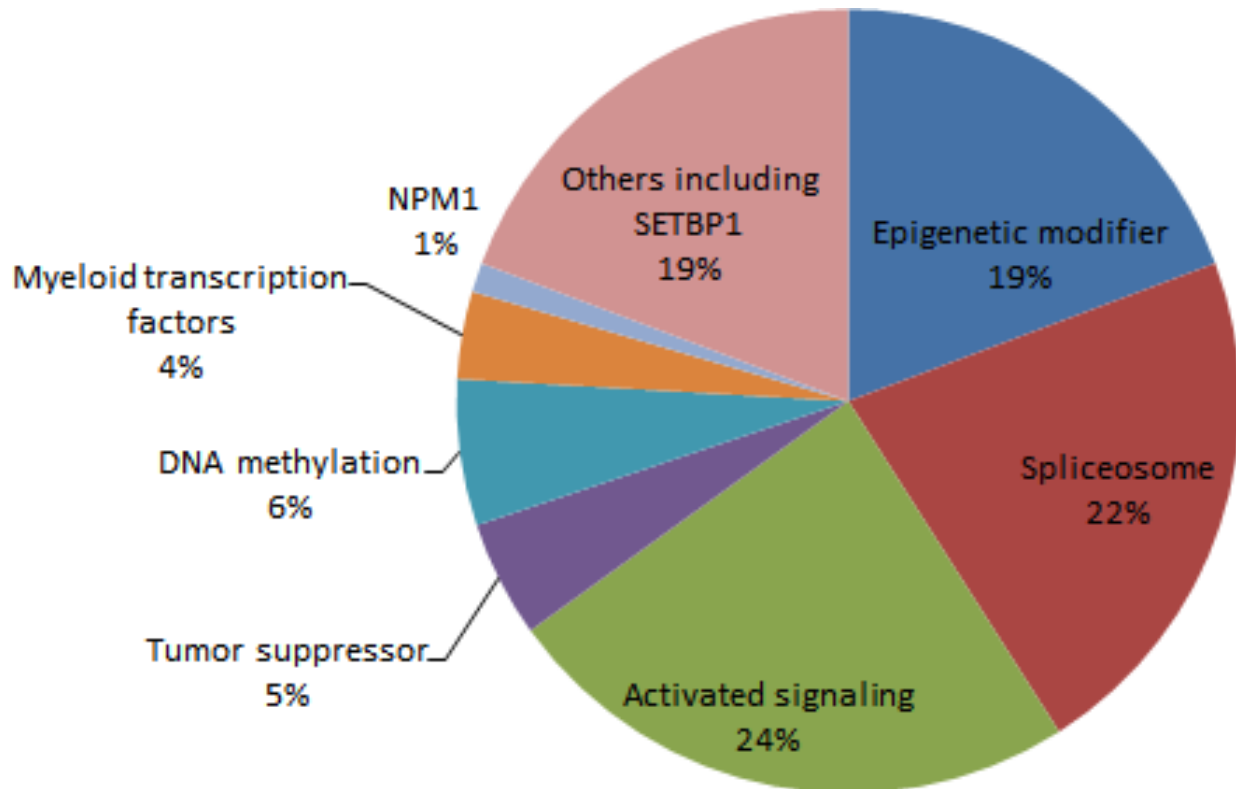

Supplementary Figure S1: Distribution of mutations into various biologic functional categories in myeloid neoplasms with i(17q) shows prominent involvement of genes of activating signaling pathway (24%, mostly in genes directly involved in *RAS* signaling), followed by spliceosome (22%, mostly *SRSF2*), epigenetic modifier genes (19%, *ASXL1*) and *SETBP1* (19%).

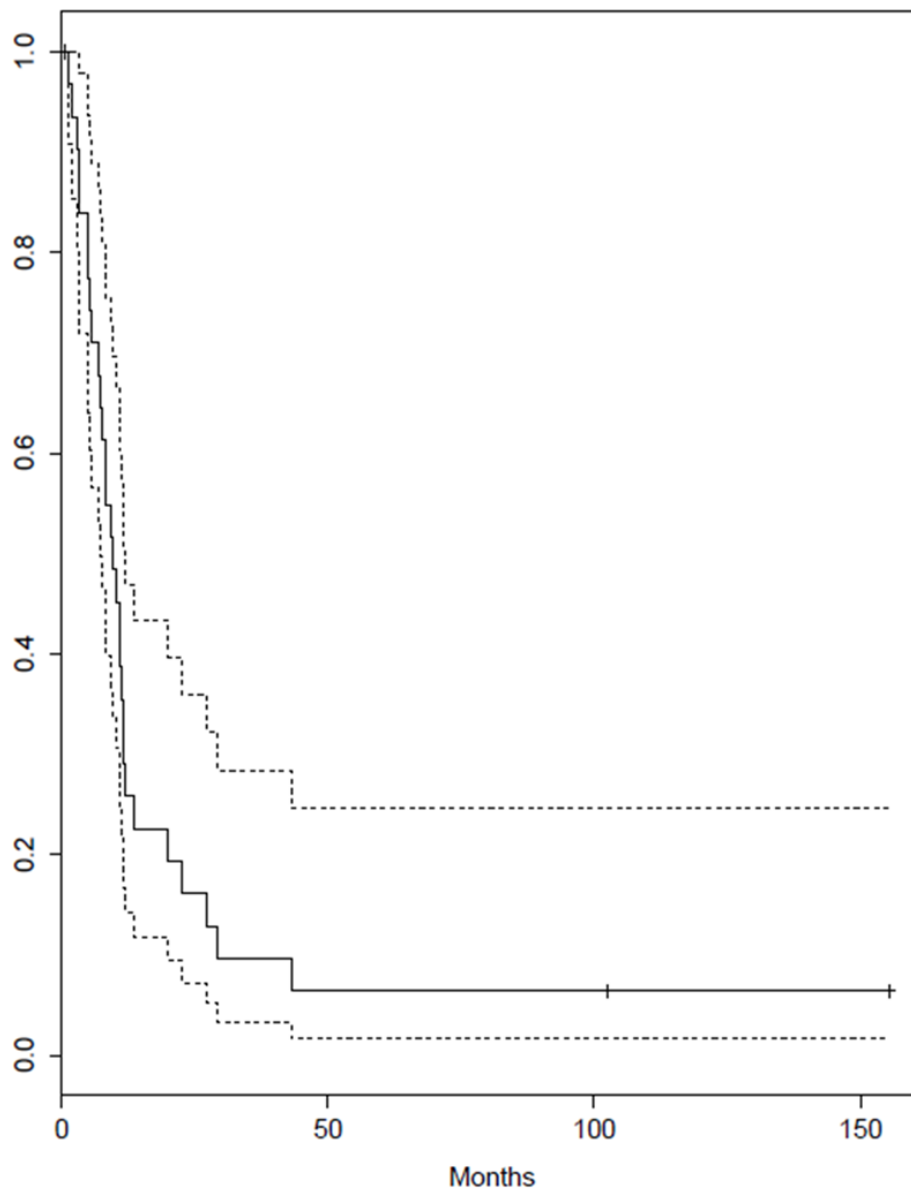

**Supplementary Figure S2: Kaplan-Meier curve showing overall survival from the onset of i(17q) abnormality.** The upper and lower dotted lines represent 95% CI.

**Supplementary Table S1: Whole-exome sequencing results on 3 cases of myeloid neoplasms associated with isolated i(17q) abnormality**

| Case | Diagnosis                                                  | Mutation                          | VAF (%) |
|------|------------------------------------------------------------|-----------------------------------|---------|
| 7    | CMML, 8% blasts                                            | <i>ASXL1</i> p. Q708X             | 43.609  |
|      |                                                            | <i>NRAS</i> p.G12R                | 40.4762 |
|      |                                                            | <i>SETBP1</i> p.G870S             | 49      |
|      |                                                            | <i>SRSF2</i> p.P95H               | 57.7778 |
| 9    | CMML, 18% blasts                                           | <i>PTPN11</i> p. D61G             | 42.1053 |
|      |                                                            | <i>SETBP1</i> p.G870S             | 46.988  |
|      |                                                            | <i>SRSF2</i> p.P95H               | 60      |
|      |                                                            | <i>ETV6</i> p.Q255X               | 48.2759 |
| 31   | AML arising from MDS, post allogeneic stem cell transplant | <i>ASXL1</i> p.Q592X              | 35.3261 |
|      |                                                            | <i>SETBP1</i> p. G870S            | 29.1005 |
|      |                                                            | <i>TP53</i> p. R249G              | 24.3243 |
|      |                                                            | <i>U2AF1</i> p. 157P              | 24.5509 |
|      |                                                            | <i>NF1</i> p.Q2637X               | 27.4112 |
|      |                                                            | <i>EGFR</i> essential splice site | 25.9494 |

**Supplementary Table S2: A list of mutations identified by 28-gene next-generation sequencing (NGS) based analysis and Sanger sequencing in all patients with the associated variant allele frequencies (for genes studied by NGS)**

| Case # | Diagnosis | Mutation               | Variant Allele Frequency | Number of Mutations |
|--------|-----------|------------------------|--------------------------|---------------------|
| 1      | MDS       | <i>ASXL1</i> p.G646fs* | 39.2                     | 2                   |
|        |           | <i>RUNX1</i> p.R166G   | 35.1                     |                     |
| 2      | aCML      | <i>ASXL1</i> R693X     | 25.16                    | 4                   |
|        |           | <i>KRAS</i> G12R       | NA                       |                     |
|        |           | <i>SETBP1</i> p.P187N  | NA                       |                     |
|        |           | <i>SRSF2</i> p.P95R    | NA                       |                     |
| 3      | aCML      | <i>ASXL1</i> p.A1016fs | 52.09                    | 2                   |
|        |           | <i>SRSF2</i> p.P95R    | NA                       |                     |
| 4      | CMML-1    | <i>ASXL1</i> p.A634fs  | 16.8                     | 5                   |
|        |           | <i>JAK2</i> p.V617F    | 49.28                    |                     |
|        |           | <i>NRAS</i> p.G12D     | 42.9                     |                     |
|        |           | <i>SETBP1</i> p.D868N  | NA                       |                     |
|        |           | <i>SRSF2</i> p.P95R    | NA                       |                     |
| 5      | CMML-1    | <i>ASXL1</i> p.A634fs  | 22.45                    | 5                   |
|        |           | <i>EZH2</i> p.R690H    | 29.15                    |                     |

|     |           |                                   |       |   |
|-----|-----------|-----------------------------------|-------|---|
|     |           | <i>IDH2</i> p.R140Q               | 10.54 |   |
|     |           | <i>JAK2</i> p.V617F               | 50.71 |   |
|     |           | <i>SRSF2</i> p.P95L               | NA    |   |
| 6   | CMML-1    | <i>ASXL1</i> p.L775*              | 49.2  | 5 |
|     |           | <i>GATA2</i> p.K390E              | 51.8  |   |
|     |           | <i>NRAS</i> p.G12D                | 39.1  |   |
|     |           | <i>NRAS</i> p.G12S                | 9.4   |   |
|     |           | <i>SETBP1</i> p.G870S             | NA    |   |
|     |           | <i>SRSF2</i> p.P95R               | NA    |   |
| 7   | CMML-1    | <i>ASXL1</i> p. Q708X             | 43.6  | 4 |
|     |           | <i>NRAS</i> p.G12R                | 40.5  |   |
|     |           | <i>SETBP1</i> p.G870S             | 49    |   |
|     |           | <i>SRSF2</i> p.P95H               | 57.78 |   |
| 8   | CMML-2    | <i>ASXL1</i> p.R1068*             | 47.7  | 4 |
|     |           | <i>PTPN11</i> p.F71L              | 47.38 |   |
|     |           | <i>SETBP1</i> p.D868N             | NA    |   |
|     |           | <i>SRSF2</i> p.P95R               | NA    |   |
| 9   | CMML-2    | <i>PTPN11</i> p. D61G             | 42.11 | 3 |
|     |           | <i>SETBP1</i> p.G870S             | 46.99 |   |
|     |           | <i>SRSF2</i> p.P95H               | 60    |   |
| 10  | MDS/MPN U | <i>SETBP1</i> p.D868N             | NA    | 2 |
|     |           | <i>SRSF2</i> p.P95R               | NA    |   |
| 11  | MDS/MPN U | <i>SRSF2</i> p.P95H               | NA    | 1 |
| 12* | MDS/MPN U | <i>ASXL1</i> p.M837_ K838delinsl* | 30.7  | 4 |
|     |           | <i>EGFR</i> p.G796S               | 11.4  |   |
|     |           | <i>ABL1</i> p.L248Q               | 12.40 |   |
|     |           | <i>SRSF2</i> p.P95R               | NA    |   |
| 13  | MDS/MPN U | <i>ASXL1</i> insGfs               | 10.28 | 2 |
|     |           | <i>HRAS</i> p.E143K               | 53.86 |   |
| 14  | MDS/MPN U | <i>NRAS</i> p.Q61R                | 5.44  | 1 |
| 15  | AML MRC   | <i>ASXL1</i> p.A634fs             | 19.69 | 4 |
|     |           | <i>NRAS</i> p.G12D                | 16.32 |   |
|     |           | <i>SETBP1</i> p.G870S             | NA    |   |
|     |           | <i>SRSF2</i> p.P95H               | NA    |   |
| 16  | AML MRC   | <i>FLT3</i> p.D835H               | 30.1  | 2 |
|     |           | <i>WT1</i> p.V362fs               | 56.94 |   |
| 17  | AML MRC   | <i>NRAS</i> p.G12D                | 45.84 | 3 |
|     |           | <i>SETBP1</i> p.D868N             | NA    |   |
|     |           | <i>U2AF1</i> p.Q157P              | NA    |   |
| 18  | AML MRC   | <i>NRAS</i> p.G12D                | 49.11 | 3 |
|     |           | <i>NRAS</i> p.G12D                | 49.2  |   |
|     |           | <i>SETBP1</i> p.G870S             | NA    |   |

|    |                                           |                              |       |   |
|----|-------------------------------------------|------------------------------|-------|---|
|    |                                           | <i>SRSF2</i> p.P95H          | NA    |   |
| 19 | AML M1                                    | <i>DNMT3A</i> p.Q415X        | 6.11  | 3 |
|    |                                           | <i>IDH1</i> p.R132C          | 10.09 |   |
|    |                                           | <i>FLT3</i> ITD              | NA    |   |
| 20 | AML MRC                                   | <i>NRAS</i> p.G12D           | 43.76 | 2 |
|    |                                           | <i>SETBP1</i> p.D868N        | NA    |   |
| 21 | AML MRC                                   | <i>KIT</i> p.E85*            | 23.8  | 1 |
| 22 | AML M4                                    | <i>ASXL1</i> p.L775*         | 44.5  | 4 |
|    |                                           | <i>PTPN11</i> p.A72V         | 45.4  |   |
|    |                                           | <i>SETBP1</i> p.D874N        | NA    |   |
|    |                                           | <i>SRSF2</i> p.P95H          | NA    |   |
| 23 | AML M2                                    | <i>ASXL1</i> p.L1170*        | 72.3  | 4 |
|    |                                           | <i>ASXL1</i> p.G1198R        | 54.9  |   |
|    |                                           | <i>TP53</i> p.P190L          | 93.2  |   |
|    |                                           | <i>KRAS</i> p.K117N          | 10.5  |   |
|    |                                           | <i>U2AF1</i> p.Q157P         | NA    |   |
| 24 | Secondary AML arising from MDS/MPN (CMML) | <i>ASXL1</i> p.H630_I641del  | 34.82 | 3 |
|    |                                           | <i>KRAS</i> p.T58R           | 7.1   |   |
|    |                                           | <i>SETBP1</i> p.D868H        | NA    |   |
| 25 | Secondary AML arising from MDS/MPN        | <i>NRAS</i> p.G12S           | 38.9  | 5 |
|    |                                           | <i>ASXL1</i> p.C975*         | 9.1   |   |
|    |                                           | <i>TET2</i> p.L1212*         | 49.6  |   |
|    |                                           | <i>TET2</i> p.H682fs*        | 47.6  |   |
|    |                                           | <i>SETBP1</i> p.G870S        | NA    |   |
|    |                                           | <i>SRSF2</i> p.P95L          | NA    |   |
| 26 | Secondary AML arising from MDS            | <i>SETBP1</i> p.D868N        | NA    | 1 |
| 27 | Secondary AML arising from MDS/MPN        | <i>FLT3</i> ITD              | NA    | 3 |
|    |                                           | <i>SETBP1</i> p.D868N        | NA    |   |
|    |                                           | <i>SRSF2</i> p.P95R          | NA    |   |
| 28 | Secondary AML arising from MDS/MPN (CMML) | <i>NRAS</i> p.G12D           | 44.1  | 1 |
| 29 | Therapy related AML                       | <i>RUNX1</i> p.S114_S115insT | 15.76 | 1 |
| 30 | Therapy related AML                       | <i>NPM1</i> p.W288fs*        | 21.54 | 4 |
|    |                                           | <i>PTPN11</i> p.G503R        | 22.15 |   |
|    |                                           | <i>IDH2</i> p.R140Q          | 22.75 |   |
|    |                                           | <i>DNMT3A</i> p.R882H        | 14.56 |   |
| 31 | AML, cannot be classified                 | <i>ASXL1</i> p.Q592*         | 23.38 | 4 |
|    |                                           | <i>TP53</i> p.R249G          | 32.4  |   |
|    |                                           | <i>SETBP1</i> p.G870S        | 29.10 |   |

|    |                                                 |                          |       |   |
|----|-------------------------------------------------|--------------------------|-------|---|
|    |                                                 | <i>U2AF1</i> p.Q157P     | 24.60 |   |
| 32 | Post-essential thrombocythemia<br>myelofibrosis | <i>TET2</i> p.L703*      | 11.49 | 3 |
|    |                                                 | <i>ASXL1</i> p.G646fs*11 | 5.59  |   |
|    |                                                 | <i>TP53</i> p.R273H      | 5.73  |   |
